# Supplementary material
Source: publisher figshare collection journal article supplement (https://tandf.figshare.com/ndownloader/files/22029123)
Supplement: Supplementary file 1 [file 22029123]

## SUPPLEMENTARY MATERIAL – BECKER ET AL. (2020)

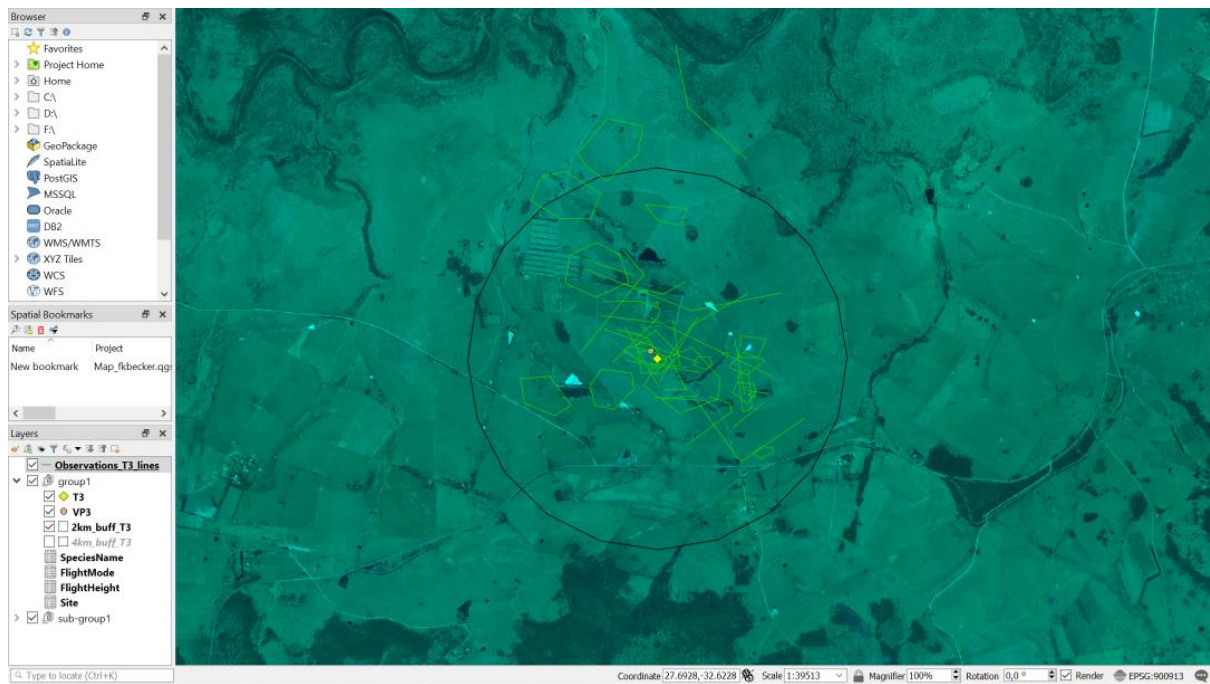

Supplemental Material 1: Screenshot of the adapted cross-platform Geographic Information System (GIS) employed to track visual observations.

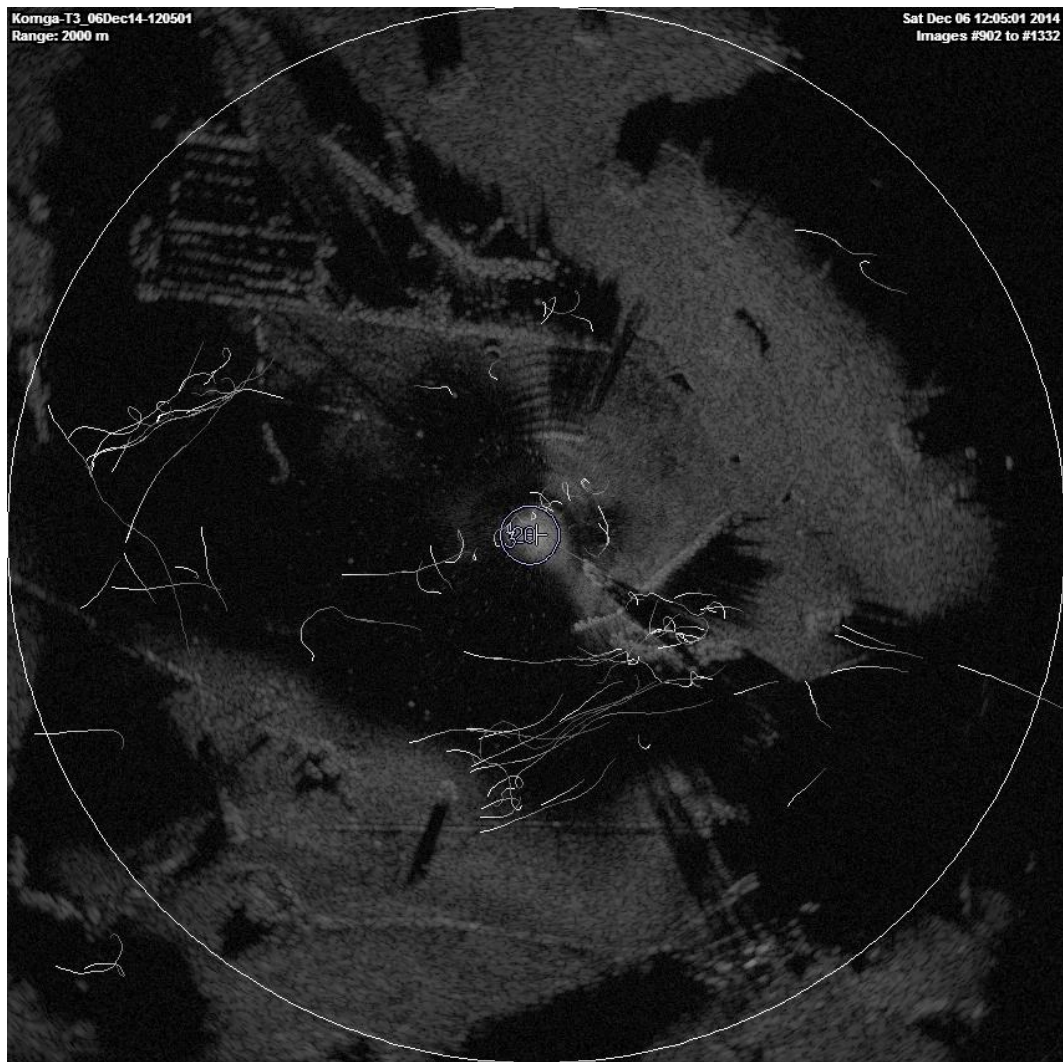

Supplemental Material 2: Sample image of Cape Vulture radar tracks (white lines) at Site T3 from 6 December 2014.
